# Supplementary material
Source: publisher figshare collection journal article supplement (https://acs.figshare.com/ndownloader/files/4155244)
Supplement: Supplementary file 1 [file 4155244]

## Supporting Information

**Table 2.** ATCI molecular docking interactions with AChE amino acid residues.

Binding contacts of best docked pose of the ligand with key residues in the active site of the model were determined (PDB entry code 1ACJ).

| Amino acid residue of AChE<br>or water molecule with its<br>binding atom | ATCI interacting<br>atom <sup>a</sup> | Distance (Å) | Type of<br>interaction |
|--------------------------------------------------------------------------|---------------------------------------|--------------|------------------------|
| Trp84/NE1-H                                                              | O3                                    | 3.96         | H-bond                 |
| His440/O                                                                 | S1                                    | 3.25         | Polar                  |
| wat634/O-H                                                               | N3                                    | 2.92         | H-bond                 |
| Trp84/CD1                                                                | C5                                    | 4.04         | Hydrophobic            |
| Trp84/CE3                                                                | C6                                    | 4.09         | Hydrophobic            |
| Phe330/CD2                                                               | C10                                   | 4.08         | Hydrophobic            |
| Ile439/CG2                                                               | C10                                   | 3.84         | Hydrophobic            |
| Gly118/CA                                                                | C6                                    | 3.99         | Hydrophobic            |
| Phe330/CE2                                                               | C4                                    | 3.74         | Hydrophobic            |
| Phe330/CZ                                                                | C9                                    | 3.89         | Hydrophobic            |

<sup>a</sup> Ligand numbering according to PyMol v. 0.99c

**Table 3.** THA molecular docking interactions with AChE amino acid residues.

Binding contacts of best docked pose of the ligand with key residues in the active site of the model were determined (PDB entry code 1ACJ).

| Amino acid residue of AChE or water molecule with its binding atom | THA interacting atom <sup>a</sup> | Distance (Å) | Type of interaction |
|--------------------------------------------------------------------|-----------------------------------|--------------|---------------------|
| His440/O <sup>b</sup>                                              | N7                                | 3.23         | H-bond              |
| wat643/O                                                           | N15                               | 3.15         | Bridged H-bond      |
| wat636/O                                                           | N15                               | 3.13         | H-bond              |
| wat634/O <sup>b</sup>                                              | N15                               | 3.12         | Bridged H-bond      |
| Trp432/CZ2 <sup>b</sup>                                            | C1                                | 3.69         | Hydrophobic         |
| Phe330/CD1 <sup>b</sup>                                            | C1                                | 3.31         | Hydrophobic         |
| Phe330/CE1 <sup>b</sup>                                            | C1                                | 3.88         | Hydrophobic         |
| Trp432/CZ2                                                         | C1                                | 3.69         | Hydrophobic         |
| Phe330/CG <sup>b</sup>                                             | C1                                | 3.82         | Hydrophobic         |
| Phe330/CG <sup>b</sup>                                             | C2                                | 3.71         | Hydrophobic         |
| Phe330/CD1 <sup>b</sup>                                            | C2                                | 3.65         | Hydrophobic         |
| Tyr442/CE1                                                         | C2                                | 3.79         | Hydrophobic         |
| Trp84/CE2 <sup>b</sup>                                             | C3                                | 3.83         | Hydrophobic         |
| Trp84/CG <sup>b</sup>                                              | C4                                | 3.78         | Hydrophobic         |
| Trp84/ CD1 <sup>b</sup>                                            | C4                                | 3.38         | Hydrophobic         |
| Phe330/CE1 <sup>b</sup>                                            | C4                                | 3.72         | Hydrophobic         |
| Phe330/CZ <sup>b</sup>                                             | C4                                | 3.87         | Hydrophobic         |
| Trp84/CD1 <sup>b</sup>                                             | C5                                | 3.50         | Hydrophobic         |
| Phe330/CD1 <sup>b</sup>                                            | C5                                | 3.73         | Hydrophobic         |
| Phe330/CE1 <sup>b</sup>                                            | C5                                | 3.35         | Hydrophobic         |
| Phe330/CD1 <sup>b</sup>                                            | C6                                | 3.35         | Hydrophobic         |
| Phe330/CE1 <sup>b</sup>                                            | C6                                | 3.45         | Hydrophobic         |
| Trp432/CZ2                                                         | C6                                | 3.49         | Hydrophobic         |
| Trp84/CE2 <sup>b</sup>                                             | C8                                | 3.84         | Hydrophobic         |

|                         |     |      |             |
|-------------------------|-----|------|-------------|
| Trp84/CG <sup>b</sup>   | C9  | 3.80 | Hydrophobic |
| Trp84/CD2 <sup>b</sup>  | C9  | 3.59 | Hydrophobic |
| Trp84/CE3 <sup>b</sup>  | C9  | 3.88 | Hydrophobic |
| Trp84/CB <sup>b</sup>   | C10 | 3.84 | Hydrophobic |
| Trp84/CG <sup>b</sup>   | C10 | 3.39 | Hydrophobic |
| Trp84/CD1 <sup>b</sup>  | C10 | 3.54 | Hydrophobic |
| Trp84/CD2 <sup>b</sup>  | C10 | 3.69 | Hydrophobic |
| His440/CD2 <sup>b</sup> | C11 | 3.62 | Hydrophobic |
| Gly441/CA               | C11 | 3.63 | Hydrophobic |
| Trp84/CZ3 <sup>b</sup>  | C12 | 3.81 | Hydrophobic |
| Glu199/CD               | C12 | 3.84 | Hydrophobic |
| Trp84/CD2 <sup>b</sup>  | C14 | 3.97 | Hydrophobic |
| Gly118/CA <sup>b</sup>  | C13 | 3.81 | Hydrophobic |
| Trp84/CE3 <sup>b</sup>  | C14 | 3.77 | Hydrophobic |

---

<sup>a</sup> Ligand numbering according to PyMol v. 0.99c

<sup>b</sup> Common amino acid residue with ATCI

**Table 4.** GNT molecular docking interactions with AChE amino acid residues.

Binding contacts of best docked pose of the ligand with key residues in the active site of the model were determined (PDB entry code 1ACJ).

| Amino acid residue of AChE or water molecule with its binding atom | GNT interacting atom <sup>a</sup> | Distance (Å) | Type of interaction |
|--------------------------------------------------------------------|-----------------------------------|--------------|---------------------|
| Ser200/OG                                                          | O17                               | 2.97         | H-bond              |
| Glu199/OE1                                                         | O18                               | 2.72         | H-bond              |
| wat820/O                                                           | O5                                | 3.07         | Bridged H-bond      |
| wat712/O                                                           | N10                               | 3.29         | Bridged H-bond      |
| wat820/O                                                           | O17                               | 3.24         | Bridged H-bond      |
| wat820/O                                                           | O18                               | 2.66         | Bridged H-bond      |
| Gly118/CA <sup>b</sup>                                             | C1                                | 3.69         | Hydrophobic         |
| Trp84/CE3 <sup>b</sup>                                             | C2                                | 3.49         | Hydrophobic         |
| Trp84/CZ3 <sup>b</sup>                                             | C2                                | 3.86         | Hydrophobic         |
| Gly118/CA <sup>b</sup>                                             | C2                                | 3.74         | Hydrophobic         |
| Trp84/CE3 <sup>b</sup>                                             | C3                                | 3.70         | Hydrophobic         |
| Trp84/CZ3 <sup>b</sup>                                             | C3                                | 3.55         | Hydrophobic         |
| Trp84/CZ3 <sup>b</sup>                                             | C4                                | 3.72         | Hydrophobic         |
| Trp84/CH2 <sup>b</sup>                                             | C4                                | 3.83         | Hydrophobic         |
| His440/CD2 <sup>b</sup>                                            | C4                                | 3.84         | Hydrophobic         |
| Phe331/CE2                                                         | C6                                | 3.60         | Hydrophobic         |
| Phe331/CZ                                                          | C6                                | 3.51         | Hydrophobic         |
| Phe290/CE1                                                         | C7                                | 3.69         | Hydrophobic         |
| Phe290/CZ                                                          | C7                                | 3.56         | Hydrophobic         |
| Phe331/CE2                                                         | C7                                | 3.45         | Hydrophobic         |
| Tyr121/CE2                                                         | C8                                | 3.68         | Hydrophobic         |
| Tyr121/CZ                                                          | C8                                | 3.85         | Hydrophobic         |
| Trp84/CG <sup>b</sup>                                              | C11                               | 3.76         | Hydrophobic         |
| Trp84/CD1 <sup>b</sup>                                             | C11                               | 3.80         | Hydrophobic         |

|            |     |      |             |
|------------|-----|------|-------------|
| Phe288/CE1 | C16 | 3.21 | Hydrophobic |
| Phe288/CZ  | C16 | 3.78 | Hydrophobic |
| Phe290/CE2 | C16 | 3.73 | Hydrophobic |
| Phe290/CZ  | C16 | 3.49 | Hydrophobic |
| Phe331/CE2 | C16 | 3.79 | Hydrophobic |
| Phe331/CZ  | C16 | 3.70 | Hydrophobic |

---

<sup>a</sup> Ligand numbering according to PyMol v. 0.99c

<sup>b</sup> Common amino acid residue with ATCI

**Table 5.** CRT molecular docking interactions with AChE amino acid residues.

Binding contacts of best docked pose of the ligand with key residues in the active site of the model were determined (PDB entry code 1ACJ).

| Amino acid residue of AChE or water molecule with its binding atom | CRT interacting atom <sup>a</sup> | Distance (Å) | Type of interaction |
|--------------------------------------------------------------------|-----------------------------------|--------------|---------------------|
| Tyr121/OH <sup>b</sup>                                             | O20                               | 3.60         | H-bond              |
| Wat634/OH <sup>b c</sup>                                           | O13                               | 4.01         | H-bond              |
| Asp285/N                                                           | O19                               | 2.86         | H-bond              |
| Phe330/CZ <sup>b c</sup>                                           | C1                                | 2.13         | Hydrophobic         |
| Phe330/CZ <sup>b c</sup>                                           | C4                                | 2.73         | Hydrophobic         |
| Tyr121/CZ <sup>b</sup>                                             | C21                               | 3.18         | Hydrophobic         |
| Phe330/CZ <sup>b c</sup>                                           | C21                               | 3.91         | Hydrophobic         |
| Phe330/CE2 <sup>b c</sup>                                          | C7                                | 3.24         | Hydrophobic         |
| Phe331/CE2 <sup>b</sup>                                            | C5                                | 4.05         | Hydrophobic         |
| Phe290/CE1 <sup>b</sup>                                            | C5                                | 3.61         | Hydrophobic         |
| Asp285/CG                                                          | C5                                | 1.36         | Hydrophobic         |
| Arg289/C                                                           | C24                               | 3.93         | Hydrophobic         |
| Phe290/CZ <sup>b</sup>                                             | C24                               | 4.07         | Hydrophobic         |
| Phe290/CA <sup>b</sup>                                             | C24                               | 4.06         | Hydrophobic         |
| Ile287/CD1                                                         | C16                               | 3.30         | Hydrophobic         |
| Ile287/CA                                                          | C17                               | 3.55         | Hydrophobic         |
| Ile287/CA                                                          | C18                               | 3.63         | Hydrophobic         |
| Ser286/C                                                           | C18                               | 3.00         | Hydrophobic         |
| Ser286/C                                                           | C15                               | 2.28         | Hydrophobic         |
| Ser286/CA                                                          | C10                               | 3.03         | Hydrophobic         |
| Leu358/CD2                                                         | C23                               | 3.80         | Hydrophobic         |
| Phe284/C                                                           | C12                               | 3.64         | Hydrophobic         |

|            |     |      |             |
|------------|-----|------|-------------|
| Asp285/C   | C12 | 1.77 | Hydrophobic |
| Asp285/CA  | C6  | 1.54 | Hydrophobic |
| Leu358/CD2 | C6  | 3.59 | Hydrophobic |
| Asp285/CA  | C6  | 1.88 | Hydrophobic |
| Asp285/CA  | C8  | 1.18 | Hydrophobic |
| Asp285/CB  | C8  | 1.85 | Hydrophobic |
| Asp285/CG  | C3  | 2.18 | Hydrophobic |

---

<sup>a</sup> *Ligand numbering according to PyMol v. 0.99c*

<sup>b</sup> *Common amino acid residue with THA and GNT*

<sup>c</sup> *Common amino acid residue with ATCI*

**Table 6. DMCRT** molecular docking interactions with AChE amino acid residues.

Binding contacts of best docked pose of the ligand with key residues in the active site of the model were determined (PDB entry code 1ACJ).

| Amino acid residue of AChE or water molecule with its binding atom | DMCRT interacting atom <sup>a</sup> | Distance (Å) | Type of interaction |
|--------------------------------------------------------------------|-------------------------------------|--------------|---------------------|
| Tyr121/OH <sup>b</sup>                                             | O46                                 | 3.09         | Bridged H-bond      |
| Wat616/OH                                                          | O46                                 | 2.42         | H-bond              |
| Asp285/N                                                           | O42                                 | 3.46         | H-bond              |
| Phe284/N                                                           | O42                                 | 3.15         | H-bond              |
| Phe284/O                                                           | O42                                 | 3.77         | H-bond              |
| Pro283/O                                                           | O42                                 | 3.36         | H-bond              |
| Asp72/CG                                                           | C51                                 | 2.63         | Hydrophobic         |
| Asp72/CB                                                           | C51                                 | 3.20         | Hydrophobic         |
| Phe330/CE1 <sup>b c</sup>                                          | C44                                 | 2.72         | Hydrophobic         |
| Tyr334/CE2                                                         | C44                                 | 3.77         | Hydrophobic         |
| Tyr334/CD2                                                         | C44                                 | 3.67         | Hydrophobic         |
| Phe330/CZ <sup>b c</sup>                                           | C1                                  | 2.61         | Hydrophobic         |
| Phe330/CE1 <sup>b c</sup>                                          | C1                                  | 3.22         | Hydrophobic         |
| Phe330/CZ <sup>b c</sup>                                           | C25                                 | 1.94         | Hydrophobic         |
| Phe330/CE2 <sup>b c</sup>                                          | C25                                 | 2.91         | Hydrophobic         |
| Phe330/CD2 <sup>b c</sup>                                          | C25                                 | 3.36         | Hydrophobic         |
| Trp279/CH2                                                         | C2                                  | 3.91         | Hydrophobic         |
| Trp279/CZ3                                                         | C2                                  | 4.09         | Hydrophobic         |
| Trp279/CZ3                                                         | C5                                  | 2.78         | Hydrophobic         |
| Trp279/CH2                                                         | C5                                  | 3.43         | Hydrophobic         |
| Trp279/CZ3                                                         | C5                                  | 2.78         | Hydrophobic         |
| Trp279/CH3                                                         | C9                                  | 3.18         | Hydrophobic         |
| Phe284/C                                                           | C22                                 | 3.77         | Hydrophobic         |



|           |    |      |             |
|-----------|----|------|-------------|
| Asp285/CA | C6 | 1.88 | Hydrophobic |
| Asp285/CA | C8 | 1.18 | Hydrophobic |
| Asp285/CB | C8 | 1.85 | Hydrophobic |
| Asp285/CG | C3 | 2.18 | Hydrophobic |

---

<sup>a</sup> *Ligand numbering according to PyMol v. 0.99c*

<sup>b</sup> *Common amino acid residue with THA and GNT*

<sup>c</sup> *Common amino acid residue with ATCI*

**Table 7.** CRC molecular docking interactions with AChE amino acid residues.

Binding contacts of best docked pose of the ligand with key residues in the active site of the model were determined (PDB entry code 1ACJ).

| Amino acid residue of AChE or water molecule with its binding atom | CRC interacting atom <sup>a</sup> | Distance (Å) | Type of interaction |
|--------------------------------------------------------------------|-----------------------------------|--------------|---------------------|
| wat640/OH                                                          | O37                               | 2.57         | H-bond              |
| Asn230/OH                                                          | O38                               | 3.69         | H-bond              |
| His398/NE2                                                         | O41                               | 3.93         | H-bond              |
| Pro232/OH                                                          | O46                               | 2.87         | H-bond              |
| Asp285/OD2                                                         | O15                               | 1.23         | H-bond              |
| Asp285/OD1                                                         | O14                               | 3.06         | H-bond              |
| Ser235/O                                                           | O36                               | 2.63         | H-bond              |
| Asn230/ND2                                                         | O45                               | 3.28         | H-bond              |
| Trp524/O                                                           | O43                               | 3.38         | H-bond              |
| wat650/OH                                                          | O28                               | 3.36         | H-bond              |
| His398/ND1                                                         | O42                               | 3.42         | H-bond              |
| Arg289/CD                                                          | C50                               | 4.02         | Hydrophobic         |
| Pro361/CG                                                          | C53                               | 3.29         | Hydrophobic         |
| Pro361/CG                                                          | C54                               | 3.50         | Hydrophobic         |
| Pro361/CB                                                          | C55                               | 2.45         | Hydrophobic         |
| Pro361/CA                                                          | C55                               | 2.67         | Hydrophobic         |
| Pro361/CA                                                          | C66                               | 3.31         | Hydrophobic         |
| Cys357/CE                                                          | C61                               | 3.53         | Hydrophobic         |
| Asp285/CG                                                          | C8                                | 3.11         | Hydrophobic         |
| Phe284/CB                                                          | C56                               | 2.63         | Hydrophobic         |
| Phe284/CG                                                          | C55                               | 3.13         | Hydrophobic         |
| Phe284/CG                                                          | C54                               | 2.53         | Hydrophobic         |
| Pro361/CB                                                          | C54                               | 2.49         | Hydrophobic         |

|           |     |      |             |
|-----------|-----|------|-------------|
| Pro232/CA | C39 | 3.55 | Hydrophobic |
| Asp285/CB | C8  | 3.86 | Hydrophobic |
| Asp285/CG | C7  | 3.30 | Hydrophobic |
| Phe284/CB | C57 | 3.62 | Hydrophobic |
| Phe284/CB | C58 | 3.74 | Hydrophobic |

---

<sup>a</sup> *Ligand numbering according to PyMol v. 0.99c*

**Table 8.** SFR molecular docking interactions with AChE amino acid residues.

Binding contacts of best docked pose of the ligand with key residues in the active site of the model were determined (PDB entry code 1ACJ).

| Amino acid residue of AChE or water molecule with its binding atom | SFR interacting atom <sup>a</sup> | Distance (Å) | Type of interaction |
|--------------------------------------------------------------------|-----------------------------------|--------------|---------------------|
| Wat634/OH <sup>b, d</sup>                                          | O19                               | 3.92         | H-bond              |
| Trp84/CD1 <sup>b, d</sup>                                          | C10                               | 3.52         | Hydrophobic         |
| Trp84/CZ2 <sup>b, d</sup>                                          | C10                               | 3.68         | Hydrophobic         |
| Trp84/CH2 <sup>b, c, d</sup>                                       | C1                                | 3.59         | Hydrophobic         |
| Trp84/CE3 <sup>b, c, d</sup>                                       | C3                                | 3.04         | Hydrophobic         |
| Phe330/CE2 <sup>b, d</sup>                                         | C14                               | 3.00         | Hydrophobic         |
| His440/CD2 <sup>b, c, d</sup>                                      | C14                               | 3.46         | Hydrophobic         |
| Gly118/CA <sup>b, c, d</sup>                                       | C21                               | 3.50         | Hydrophobic         |

<sup>a</sup> Ligand numbering according to PyMol v. 0.99c

<sup>b</sup> Common amino acid residue with THA

<sup>c</sup> Common amino acid residue with GNT

<sup>d</sup> Common amino acid residue with ATCI

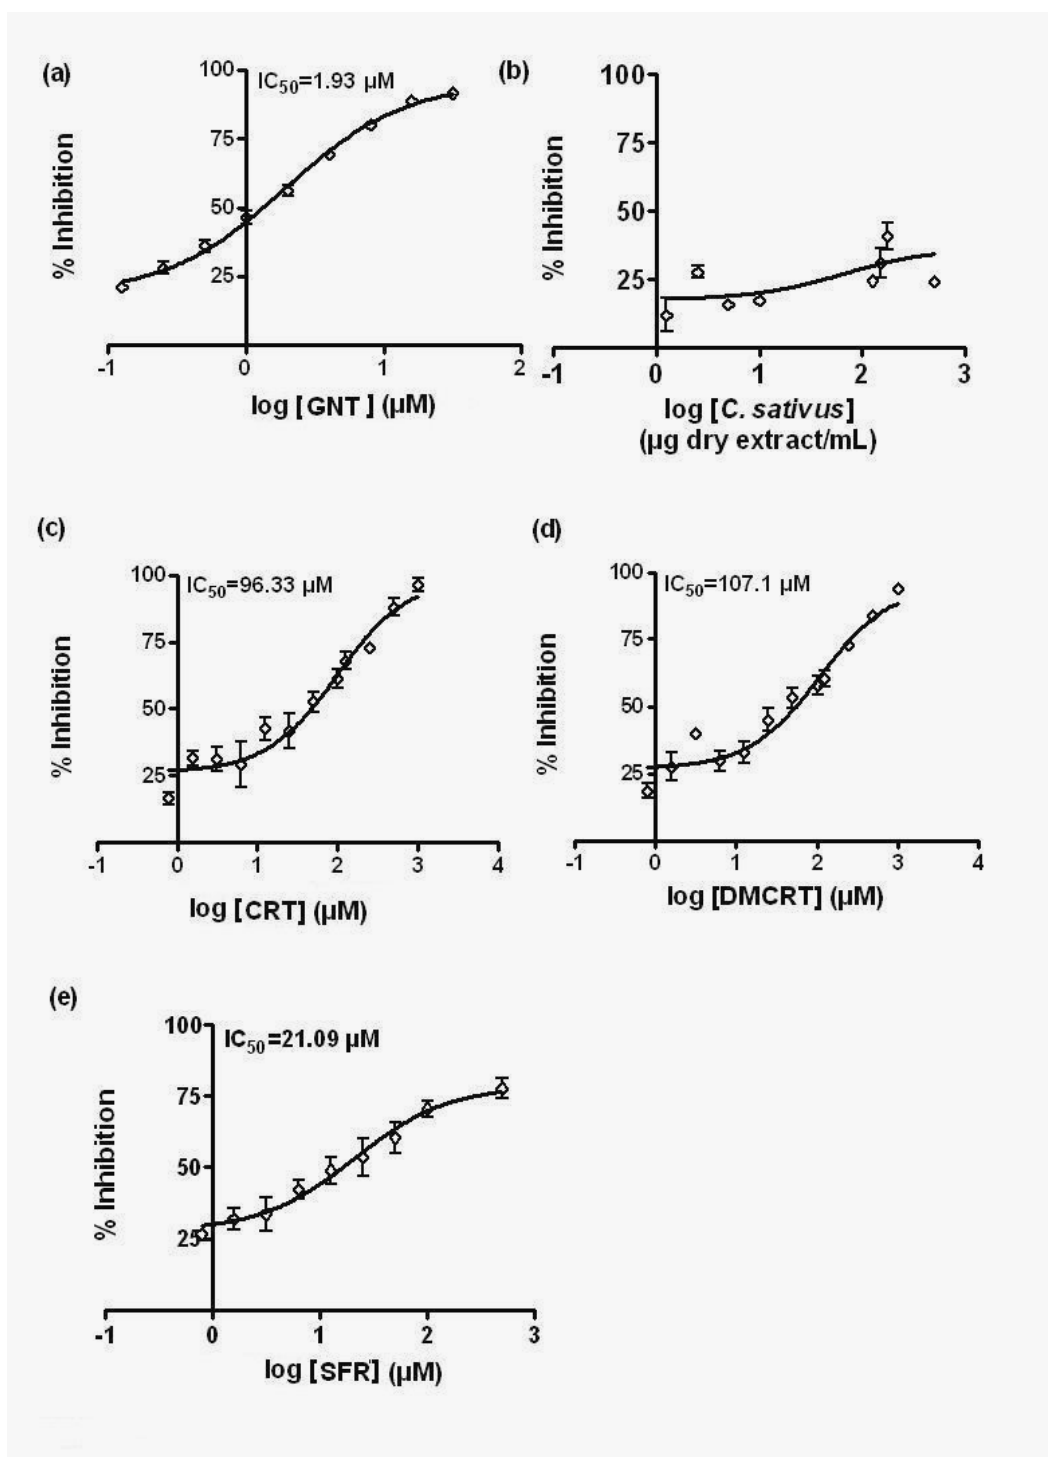

**Fig. 3** *In vitro* ACHE (from electric eel) inhibitory activity of (a) GNT (final concentration of 1–32  $\mu M$ ), (b) saffron and (c-e) its constituents (final concentrations 5–200  $\mu g/mL$  and 5–500  $\mu M$ , respectively). The final concentration of ATCI used was 1.875 mM.  $IC_{50}$  values were calculated from log  $\mu M$  back to  $\mu M$ .
